# Supplementary material for: Tuberculosis Co-Infection Is Common in Patients Requiring Hospitalization for COVID-19 in Belarus: Mixed-Methods Study
Source: MDPI journal article supplement (doi:10.3390/ijerph19074370), 2022-04-05
Supplement: s1 [file s1]

## Supplementary Material

Table S1: Guide for individual interviews with health care workers involved in Xpert MTB/RIF testing among patients with COVID-19 requiring hospitalization in Belarus

| Question                                                                                                                                   | Probes                                                                                                                                                                                                         | Thematic code                    |
|--------------------------------------------------------------------------------------------------------------------------------------------|----------------------------------------------------------------------------------------------------------------------------------------------------------------------------------------------------------------|----------------------------------|
| 1. How COVID-19 outbreak and related interventions have influenced TB screening in Belarus?                                                | None                                                                                                                                                                                                           | relevance – general              |
| 2. How relevant is TB screening to the people diagnosed with COVID-19?                                                                     | Relevant / not relevant<br>What groups of people diagnosed with COVID-19 should be tested (i.e., all, severe cases, elderly etc.)?                                                                             | relevance - population           |
| 3. What are the documents outlining TB screening in patients with COVID-19 in Belarus?                                                     | National protocols / guidelines<br>Facility-level documents                                                                                                                                                    | guidelines                       |
| 4. How patients with COVID-19 were informed about Xpert MTB/RIF testing in your facility?                                                  | For whom the test was offered<br>Who managed initial counselling?<br>What information was shared with patients?                                                                                                | offer                            |
| 5. Could you please describe in detail how Xpert MTB/RIF testing was conducted in patients with COVID-19 in your facility?                 | Testing algorithm<br>Sample collection setting<br>Staff involved<br>Sample delivery to the laboratory<br>Result notification                                                                                   | testing logistics                |
| 6. What is the further pathway for the patient to confirm TB diagnosis and initiate treatment in your facility?                            | Diagnosis algorithm<br>Staff involved (Can health workers managing COVID-19 treatment in TB hospitals confirm TB diagnosis?)<br>Do patients remain in the same room after confirming COVID-19/TB co-infection? | diagnosis                        |
| 7. Can you please tell me about your thoughts and experience how patients with COVID-19 reacted to Xpert MTB/RIF testing in your facility? | Interest in testing<br>Questions asked by patients about testing<br>Refusals, possible explanations/causes for patients refusing testing<br>Possible facilitators for patients to do testing                   | perceived patient views          |
| 8. What is the level of safety of the procedures in the Xpert MTB/RIF testing among patients with COVID-19?                                | Infection control<br>Any unexpected adverse events                                                                                                                                                             | safety                           |
| 9. Based on your experience, what could be done differently to manage Xpert MTB/RIF testing in TB hospitals?                               | Infrastructure<br>Staff<br>Sample collection<br>Sample delivery to the laboratory<br>Result notification                                                                                                       | service delivery recommendations |
| 10. In your opinion what are the main challenges/obstacles for the TB screening in patients with COVID-19 in TB hospitals?                 | Absence of clear policy and guidelines<br>Lack of knowledge of specialists                                                                                                                                     | barriers – TB facilities         |

|                                                                                                                                                        |                                                                                                                                            |                                           |
|--------------------------------------------------------------------------------------------------------------------------------------------------------|--------------------------------------------------------------------------------------------------------------------------------------------|-------------------------------------------|
|                                                                                                                                                        | Lack of health personnel or unmotivated personnel<br>Lack/or problems with infrastructure<br>Lack of funding                               |                                           |
| 11. What do you think about integrating TB screening to other health facilities providing diagnosis and treatment services for patients with COVID-19? | What facilities should provide TB screening in addition to COVID-19 diagnosis and treatment<br>How TB screening should be managed there    | other facilities – feasibility            |
| 12. In your opinion what would be the main challenges/obstacles for the TB screening in patients with COVID-19 in other health facilities?             | See #10<br>Discuss the following health facilities: primary health care / polyclinics and infectious disease hospitals.                    | other facilities – barriers               |
| 13. What do you think about sustainability of TB screening in patients with COVID-19 in TB hospitals?                                                  | Willingness of staff to continue TB screening<br>Available resources<br>Whether TB hospitals will continue to admit patients with COVID-19 | sustainability and intent to continue use |
| 14. Any other important issues related to TB screening in patients with COVID-19 you would like to mention?                                            | None                                                                                                                                       | closing remarks                           |
